# Supplementary material
Source: MDPI journal article supplement (https://www.mdpi.com/2297-8739/11/2/59)
Supplement: s1 [file s1 › separations-2829207-supplementary.pdf]

# Stability and reactivity of guaiacylglycerol- $\beta$ -guaiacyl ether, a compound modeling $\beta$ -O-4 linkage in lignin

Zeinab Rabiei <sup>1</sup>, Andrew Simons <sup>1</sup>, Magdalena Folkmanova <sup>2</sup>, Tereza Vesela <sup>2</sup>, Ondrej Uhlík <sup>2</sup>, Evgenii Kozliak <sup>1\*</sup>, Alena Kubátová<sup>1,\*</sup>

<sup>1</sup> University of North Dakota, Chemistry Department, Grand Forks, ND, 58201, USA

<sup>2</sup> University of Chemistry and Technology, Prague, Department of Biochemistry and Microbiology, Technická 3, Prague, 16628, Czechia \* Correspondence: alena.kubatova@UND.edu; Evgenii.kozliak@UND.edu Tel.: +1 701 7770348

## 1 Structures and mass spectra of G $\beta$ 2 and its identified breakdown products

The structures and mass spectra of the compounds used or observed in this study are provided in Figures S1 and S2.

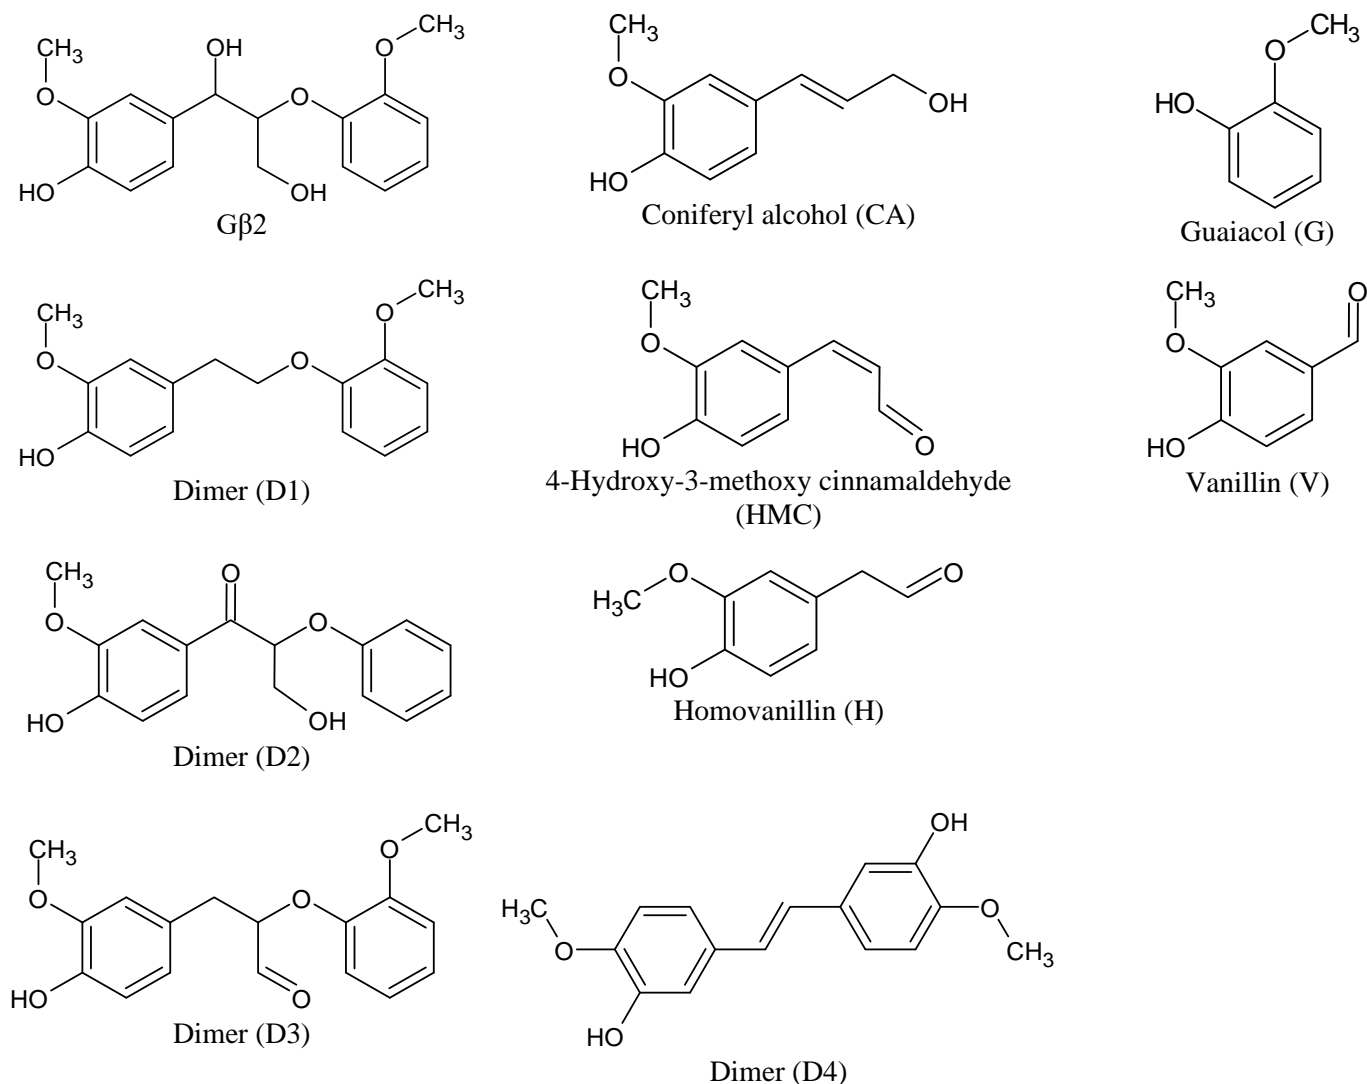

Figure S1. Structures of the compounds considered in this study.

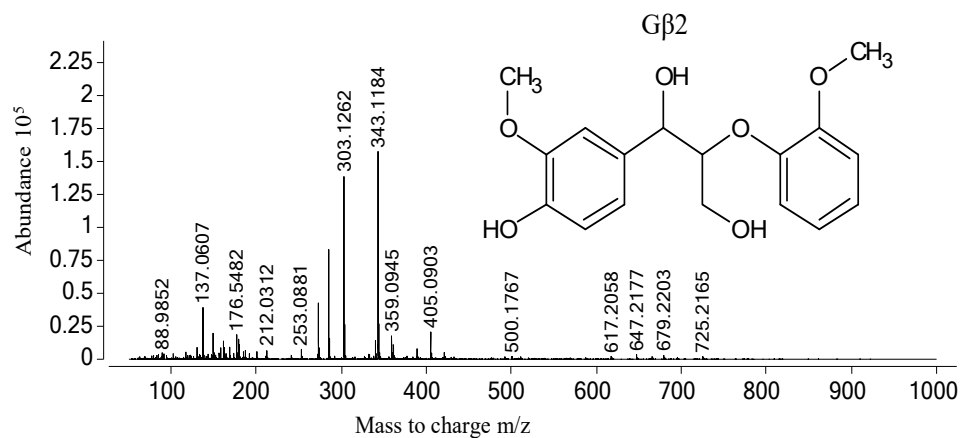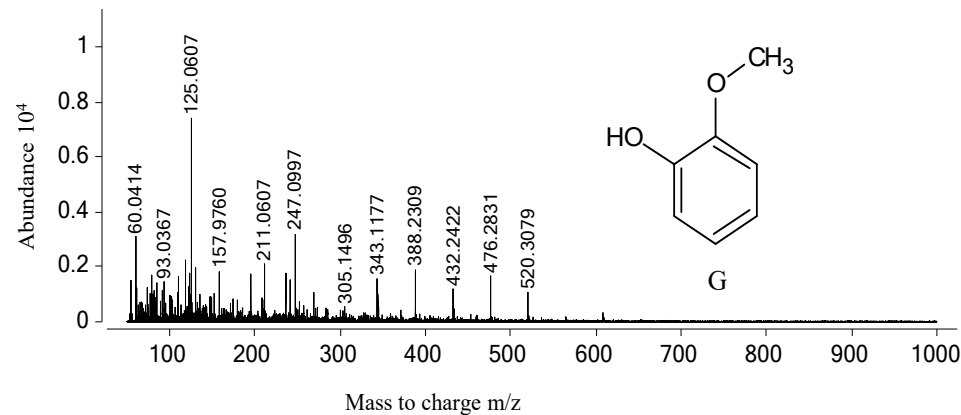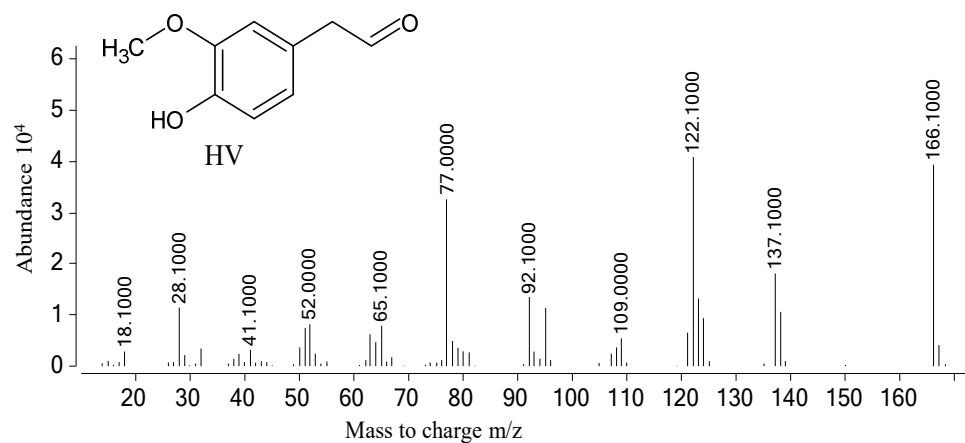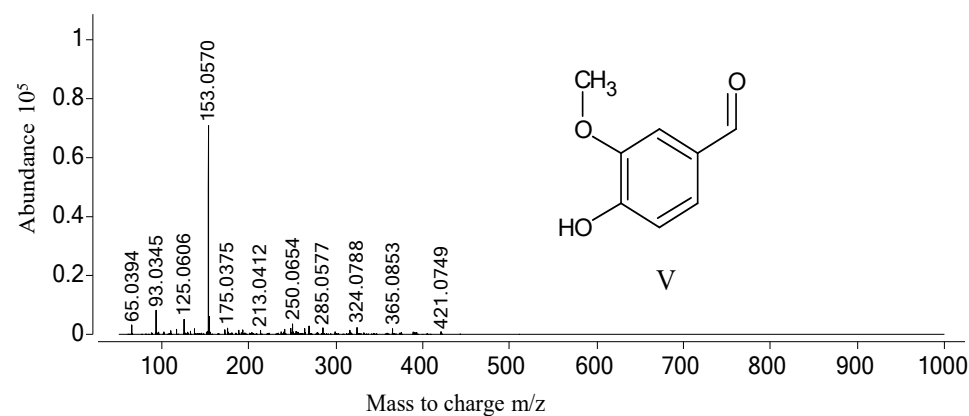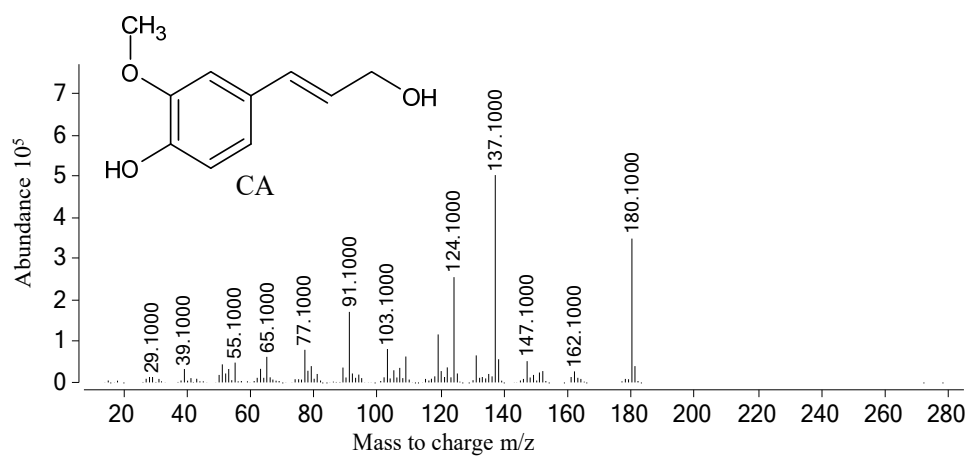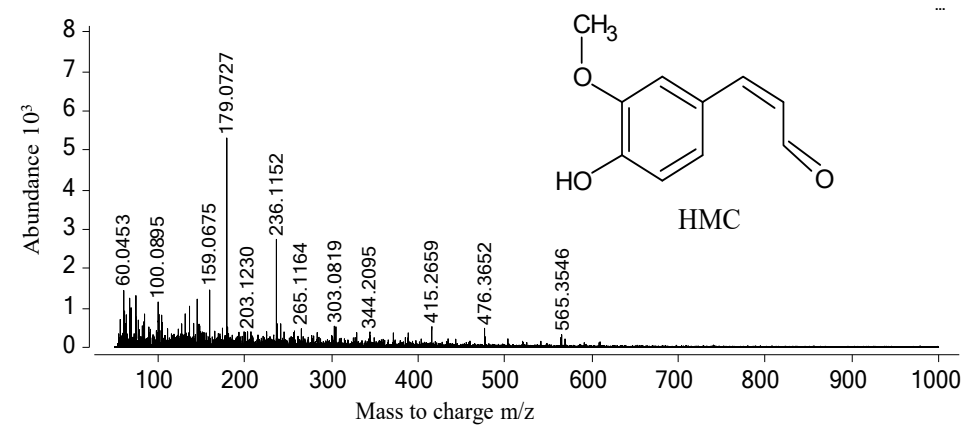

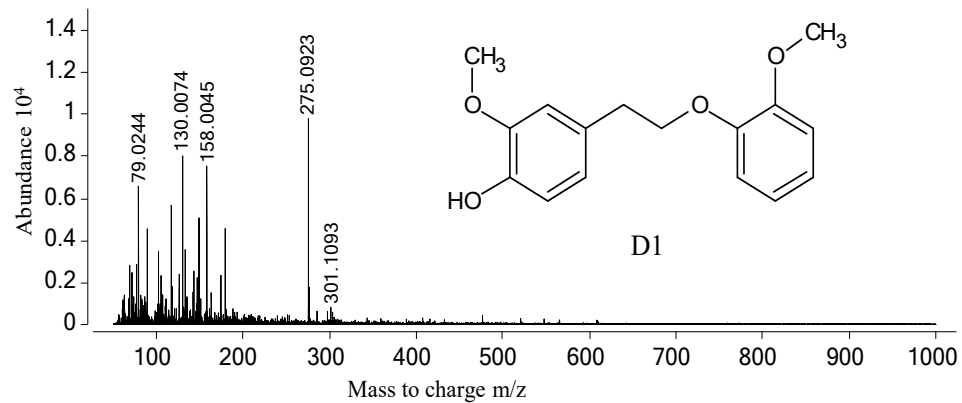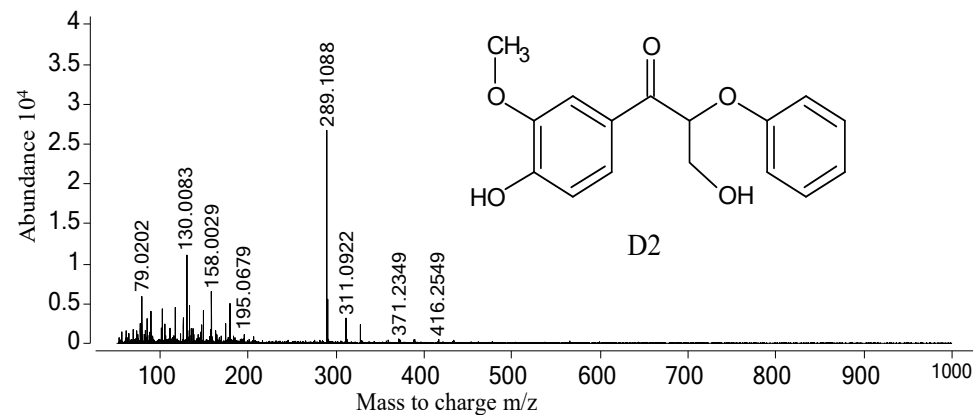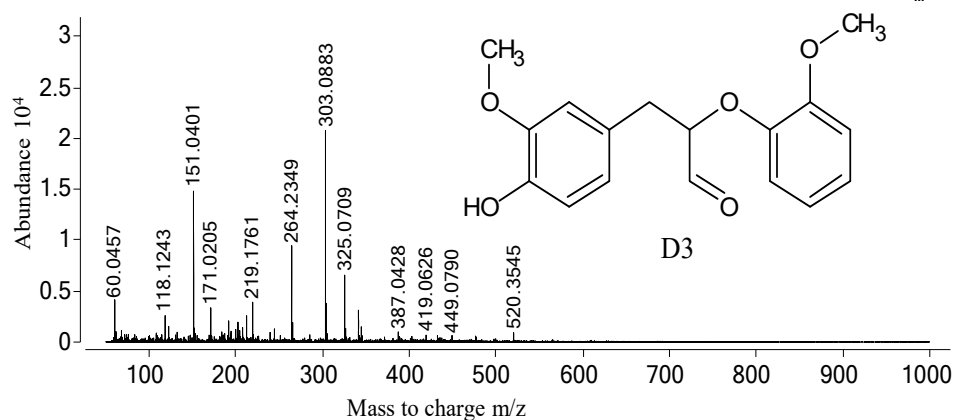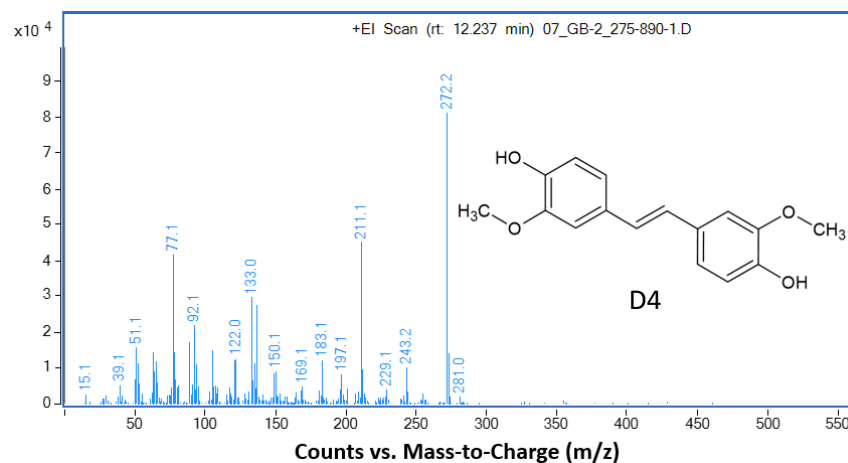

Figure S2. ESI-mass spectra of the compounds observed in this study. MS spectrum for D4 was obtained using GC-EI-MS.

## 2 Experimental details of the subcritical water experiments

A stock solution of G $\beta$ 2 with a concentration of 10,000  $\mu$ g/mL was prepared. A set of five reaction vessels was prepared containing 0.070 mL G $\beta$ 2 and 2.430 mL of water to reach the final concentration, 300  $\mu$ g/mL. The G $\beta$ 2 amount and the water volume were calculated with regards to obtaining subcritical conditions in the given vessel having a length of 6.4 cm and an internal diameter of 0.7 cm. The vessels were sealed with two stainless steel caps of 0.5-1.0 mL volume. The volume of the vessel without the caps was 2.46 mL resulting in the final volume of the sealed vessel being 3.5-4 mL. The presence of the caps ensured a sufficient headspace that was important to maintain the gas/liquid equilibrium, which was crucial for maintaining subcritical conditions and avoiding any potential safety issues resulting from the excessive pressure in the vessel. The procedure of how to calculate the pressure and the portion of the liquid phase inside the vessel in order to ensure safe conditions is as follows:

Determination of cap volume through mass substitution.

1. Mass of H<sub>2</sub>O to fill the cylinder and one cap = 3.21 g
2. Density of H<sub>2</sub>O at 20.4 °C = 0.9981 g/mL
3. Volume of H<sub>2</sub>O in cylinder w/cap = 3.2 mL
4. Cylinder volume =  $\pi \times 6.4 \text{ cm} \times (0.70/2 \text{ cm})^2 = 2.5 \text{ cm}^3 \text{ (mL)}$
5. Volume of cap = (3) – (4) = 0.77 mL
6. Vessel volume = (4) + 2  $\times$  (5) = 3.9 mL

Consequently, saturation conditions of the reaction solvent (water) were obtained for the three tested temperatures: 150, 200, and 250 °C. The information is available online on the National Institute of Standards and Technology (NIST) web page, <https://webbook.nist.gov/>.

Since the reaction mixture is not water by itself, but, rather, water with G $\beta$ 2, it was necessary to determine the density of water in the mixture. For the reaction experiments conducted at the above-listed three different temperatures, 0.07 mL of G $\beta$ 2 was used. Assuming that G $\beta$ 2 is not

compressible, the potential non-additivity of volumes can be ignored due to the small amounts of Gβ2. Therefore as water fills the remainder of the internal vessel space, the density of water in the mixture with Gβ2 can be calculated the following way:

$$\text{Density of H}_2\text{O} = \frac{\text{Mass of water}}{V_{\text{vessel}} - V_{\text{G}\beta 2}} = \frac{2.4 \text{ g}}{3.983 \text{ mL} - 0.07 \text{ mL}} = 0.61 \text{ g/mL}$$

### 3 Optimization of ESI conditions in subcritical water treatment experiments

Capillary and fragmentor voltages were evaluated in terms of ionization efficiency. Table S1 presents the summary of experimental conditions used for direct infusion analysis of Gβ2 with ESI in positive and negative modes with different solvents. The selection of solvent and ionization mode (positive or negative) had a clear impact on their ionization. As a result of these experiments, formic acid and 50% acetonitrile appear to be the most suitable electrolyte and solvent, respectively.

Table S1: Acquired mass responses for target ions dissolved in various solvent and electrolyte systems in positive/negative mode and varying fragmentor and capillary voltages performed using direct infusion.

| Capillary/Fragmentor voltages (drying gas: 350 °C and 12 L/min; nebulization pressure 25 psig) |                                           |              |              |              |              |              |              |              |              |              |
|------------------------------------------------------------------------------------------------|-------------------------------------------|--------------|--------------|--------------|--------------|--------------|--------------|--------------|--------------|--------------|
|                                                                                                | 3000/<br>120                              | 3000/<br>150 | 3500/<br>100 | 3500/<br>120 | 3500/<br>150 | 3500/<br>180 | 4000/<br>150 | 4500/<br>150 | 5000/<br>150 | 5500/<br>150 |
| Gβ2                                                                                            | 2.5 mM FA +%50 ACN/pos                    | 1500         | 1800         | 1800         | 2000         | 2300         | 2500         | 2200         | 2200         | 2000         |
|                                                                                                | 2.5 mM FA +%50 ACN/neg                    | 60           | 70           | 80           | 113          | 95           | 50           | 80           |              |              |
|                                                                                                | 2.5 mM FA +%50 MeOH/pos                   | 1000         | 1200         | 1200         | 1550         | 1800         | 1850         | 2000         | 2300         | 2900 3600    |
|                                                                                                | 2.5 mM FA +%50 MeOH /neg                  | 55           | 60           | 62           | 70           | 88           | 90           | 105          | 98           |              |
|                                                                                                | 2.5 mM NH <sub>4</sub> OAc +%50 ACN/pos   | -            | -            | 330          | 385          | 490          | 570          | 650          | 640          | 600 440      |
|                                                                                                | 2.5 mM NH <sub>4</sub> OAc +%50 ACN/neg   | 30           | 33           | 44           | 51           | 68           | 77           | 80           | 55           |              |
|                                                                                                | 2.5 mM NH <sub>4</sub> OAc +%50 MeOH /pos | 340          | 510          | 603          | 660          | 684          | 709          | 800          | 1100         | 1200 1425    |
|                                                                                                | 2.5 mM NH <sub>4</sub> OAc +%50 MeOH /neg | -            | -            | 49           | 52           | 55           | 60           | 63           | 50           |              |

Using direct infusion, the prepared solutions were directly injected to TOF-MS at a flow rate of 10 μL/min. The capillary voltage was optimized between 3000-6000 V in positive mode and 2000-

4000 V in negative mode. The fragmentor voltage was optimized between 110 -180 V. Table S1 represents the best responses for G $\beta$ 2.
